# Supplementary material for: The Impostor Phenomenon Construct in Medical Education: A Meta-Analysis of its Prevalence and a Critical Appraisal of its Measurement
Source: Research Square preprint supplement (doi:10.21203/rs.3.rs-7650603/v1), 2025-10-21
Supplement: Supplementary file 1 [file 9ba23d168013a7b7974d1321.docx]

**Table of Contents of the Supplementary materials**

[**Tables 2**](#_heading=h.knnqa1839t1j)

[**Table 1:** Search Strategy. 2](#_heading=h.pf22y2682y04)

[**Table 2:** Quality assessment of the included studies using Newcastle Ottawa scale (NOS) for cross-sectional and cohort studies. 3](#_heading=h.2wup7f423qb3)

[**Figures 5**](#_heading=h.x82tjvvpod71)

[**Figure 1:** Funnel plot asymmetry assessing publication bias 5](#_heading=h.3picuux0upx)

**Figure 2:** Forest plot of the prevalence of Impostor phenomenon (IP) by sex using a random-effects model……………………………………………………….…………….... 6

**Figure 3:** Forest plot of the prevalence of Impostor phenomenon (IP) by academic year using a random-effects model……………………………………………………….. 7

**Figure 4:** Forest plot of the prevalence of Impostor phenomenon (IP) by region using a random-effects model…………………………………………………………………….. 8

**Figure 5:** Forest plot of the prevalence of Impostor phenomenon (IP) by tool using a random-effects model………………………………………………………………………. 9

**Figure 6:** Forest plot of the prevalence of Impostor phenomenon (IP) by quality using a random-effects model…………………………………………………………………….10

**Figure 7:** Baujat plot identifying influential studies…………..………………………… 11

**Figure 8:** Influence diagnostics plot……………………………...……………………… 12

**Figure 9:** Forest plot of the sensitivity analysis after removing outliers...…………….. 13

**Figure 10:** Leave-one-out sensitivity analysis...……………………………………….. 14

# Tables

## Table 1 Search Strategy.

| **Database** | **Search strategy** |
| --- | --- |
| **PubMed &**  **CINHAL** | ("impostor phenomenon" OR "imposter phenomenon" OR "impostor syndrome" OR "imposter syndrome" OR impostorism OR imposterism) AND ("medical student*" OR "medical education" OR "medical trainee*" OR "medical school" OR "medical undergraduate*" OR "clinical student*" OR "future physician*" OR "physician trainee*" OR "health profession student*" OR "medical learner*") |
| **Web of Science** | (TS= ("impostor phenomenon" OR "imposter phenomenon" OR "impostor syndrome" OR "imposter syndrome" OR impostorism OR imposterism) OR AB=("impostor phenomenon" OR "imposter phenomenon" OR "impostor syndrome" OR "imposter syndrome" OR impostorism OR imposterism) OR KP=("impostor phenomenon" OR "imposter phenomenon" OR "impostor syndrome" OR "imposter syndrome" OR impostorism OR imposterism)) AND (TS= ("medical student*" OR "medical education" OR "medical trainee*" OR "medical school" OR "medical undergraduate*" OR "clinical student*" OR "future physician*" OR "physician trainee*" OR "health profession student*" OR "medical learner*") OR AB=("medical student*" OR "medical education" OR "medical trainee*" OR "medical school" OR "medical undergraduate*" OR "clinical student*" OR "future physician*" OR "physician trainee*" OR "health profession student*" OR "medical learner*") OR KP=("medical student*" OR "medical education" OR "medical trainee*" OR "medical school" OR "medical undergraduate*" OR "clinical student*" OR "future physician*" OR "physician trainee*" OR "health profession student*" OR "medical learner*")) |
| **Scopus** | TITLE-ABS-KEY("Impostor" OR "Imposter" OR "Impostor's" OR "Imposter's" OR "Impostorism" OR "Imposterism")  AND  TITLE-ABS-KEY("Medical student" OR "Medical students" OR "Medical education" OR "Medical trainee" OR "Medical trainees" OR "Medical school" OR "Medical undergraduate*" OR "Clinical student*" OR "Future physician*" OR "Physician trainee*" OR "Health profession student*" OR "Medical learner*") |

## Table 2 Quality assessment of the included studies using Newcastle Ottawa scale (NOS) for cross-sectional and cohort studies.

| **Study ID**  **Domain** | **Selection** | **Comparability** | **Outcome** | **Overall** | **Overall decision** |
| --- | --- | --- | --- | --- | --- |
| **Houseknecht et al.; 2019*** | 3 | 1 | 3 | 7 | Good |
| **Rosenthal et a.; 2021*** | 3 | 1 | 3 | 7 | Good |
| **Tran et al.; 2024*** | 2 | 1 | 2 | 5 | Moderate |
| **Choron et al.; 2022*** | 3 | 1 | 2 | 6 | Moderate-Good |
| **Addae-Konadu et al.; 2021** | 3 | 1 | 2 | 6 | Satisfactory quality |
| **Al Lawati et al.; 2023** | 4 | 1 | 2 | 7 | Good quality |
| **Alok et al.; 2024** | 3 | 0 | 1 | 4 | Poor quality |
| **Alsaleemet al.; 2021** | 4 | 1 | 2 | 7 | Good quality |
| **Alzufari et al.; 2024** | 5 | 1 | 2 | 8 | Good quality |
| **Brennan-Wydra et al.; 2021** | 4 | 1 | 2 | 7 | Good quality |
| **Buathong et al.; 2024** | 3 | 1 | 2 | 6 | Satisfactory quality |
| **Camara et al.; 2022** | 2 | 1 | 2 | 5 | Satisfactory quality |
| **Clark et al.; 2024** | 2 | 1 | 1 | 4 | Poor quality |
| **De et al.; 2024** | 4 | 1 | 2 | 7 | Good quality |
| **Diaconescu et al.; 2024** | 5 | 1 | 2 | 8 | Good quality |
| **El-Setouhy et al.; 2024** | 4 | 1 | 2 | 7 | Good quality |
| **Elnaggar et al.; 2023** | 3 | 1 | 2 | 6 | Satisfactory quality |
| **Franchi et al.; 2022** | 3 | 1 | 2 | 6 | Satisfactory quality |
| **Henning et al.; 1998** | 3 | 1 | 2 | 6 | Satisfactory quality |
| **Herța et al.; 2024** | 2 | 0 | 1 | 3 | Poor quality |
| **Holliday et al.; 2019** | 3 | 1 | 1 | 5 | Satisfactory quality |
| **Hu et al.; 2019** | 2 | 1 | 2 | 5 | Satisfactory quality |
| **Khalil et al.; 2024** | 4 | 1 | 2 | 7 | Good quality |
| **Kim et al.; 2024** | 2 | 1 | 2 | 5 | Satisfactory quality |
| **Klen et al.; 2023** | 3 | 1 | 2 | 6 | Satisfactory quality |
| **Kristofferson et al.; 2024** | 3 | 1 | 2 | 6 | Satisfactory quality |
| **Levant et al.; 2020** | 3 | 1 | 2 | 6 | Satisfactory quality |
| **Levant et al.; 2020** | 3 | 1 | 2 | 6 | Satisfactory quality |
| **Mashhadi et al.; 2022** | 2 | 1 | 2 | 5 | Satisfactory quality |
| **Naser et al.; 2022** | 2 | 1 | 2 | 5 | Satisfactory quality |
| **Neufeld et al.; 2022** | 4 | 1 | 2 | 7 | Good quality |
| **Neufeld et al.; 2024** | 3 | 1 | 2 | 6 | Satisfactory quality |
| **Ogunyemi et al.; 2022** | 4 | 1 | 2 | 7 | Good quality |
| **Priya et al.; 2024** | 3 | 1 | 2 | 6 | Satisfactory quality |
| **Qureshi et al.; 2017** | 3 | 0 | 2 | 5 | Satisfactory quality |
| **Rice et al.; 2023** | 3 | 1 | 2 | 6 | Satisfactory quality |
| **Sawant et al.; 2023** | 2 | 1 | 2 | 5 | Satisfactory quality |
| **Shill-Russell et al.; 2022** | 2 | 1 | 2 | 5 | Satisfactory quality |
| **Shinawatra et al.; 2023** | 3 | 1 | 2 | 6 | Satisfactory quality |
| **Shreffler et al.; 2020** | 3 | 1 | 2 | 6 | Satisfactory quality |
| **Sivananthajothy et al.; 2024** | 3 | 1 | 2 | 6 | Satisfactory quality |
| **Vilchez-Cornejo et al.; 2023** | 3 | 1 | 2 | 6 | Satisfactory quality |
| **Vilwok et al.; 2016** | 3 | 1 | 3 | 7 | Good quality |
| **Wang et al.; 2023** | 3 | 1 | 2 | 6 | Satisfactory quality |
| **Wrench et al.; 2024** | 3 | 1 | 3 | 7 | Good quality |
| **Gupta el al.; 2025** | 4 | 1 | 2 | 7 | Good quality |

# Figures


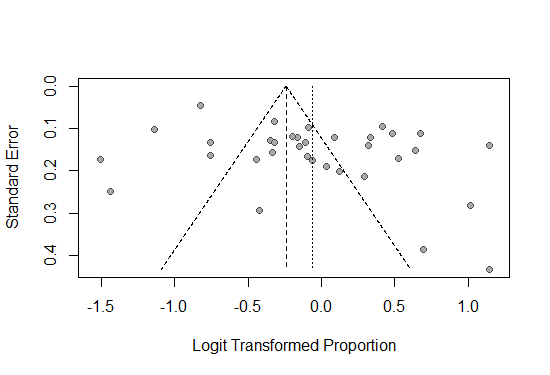


*Figure S1. Funnel plot assessing publication bias*


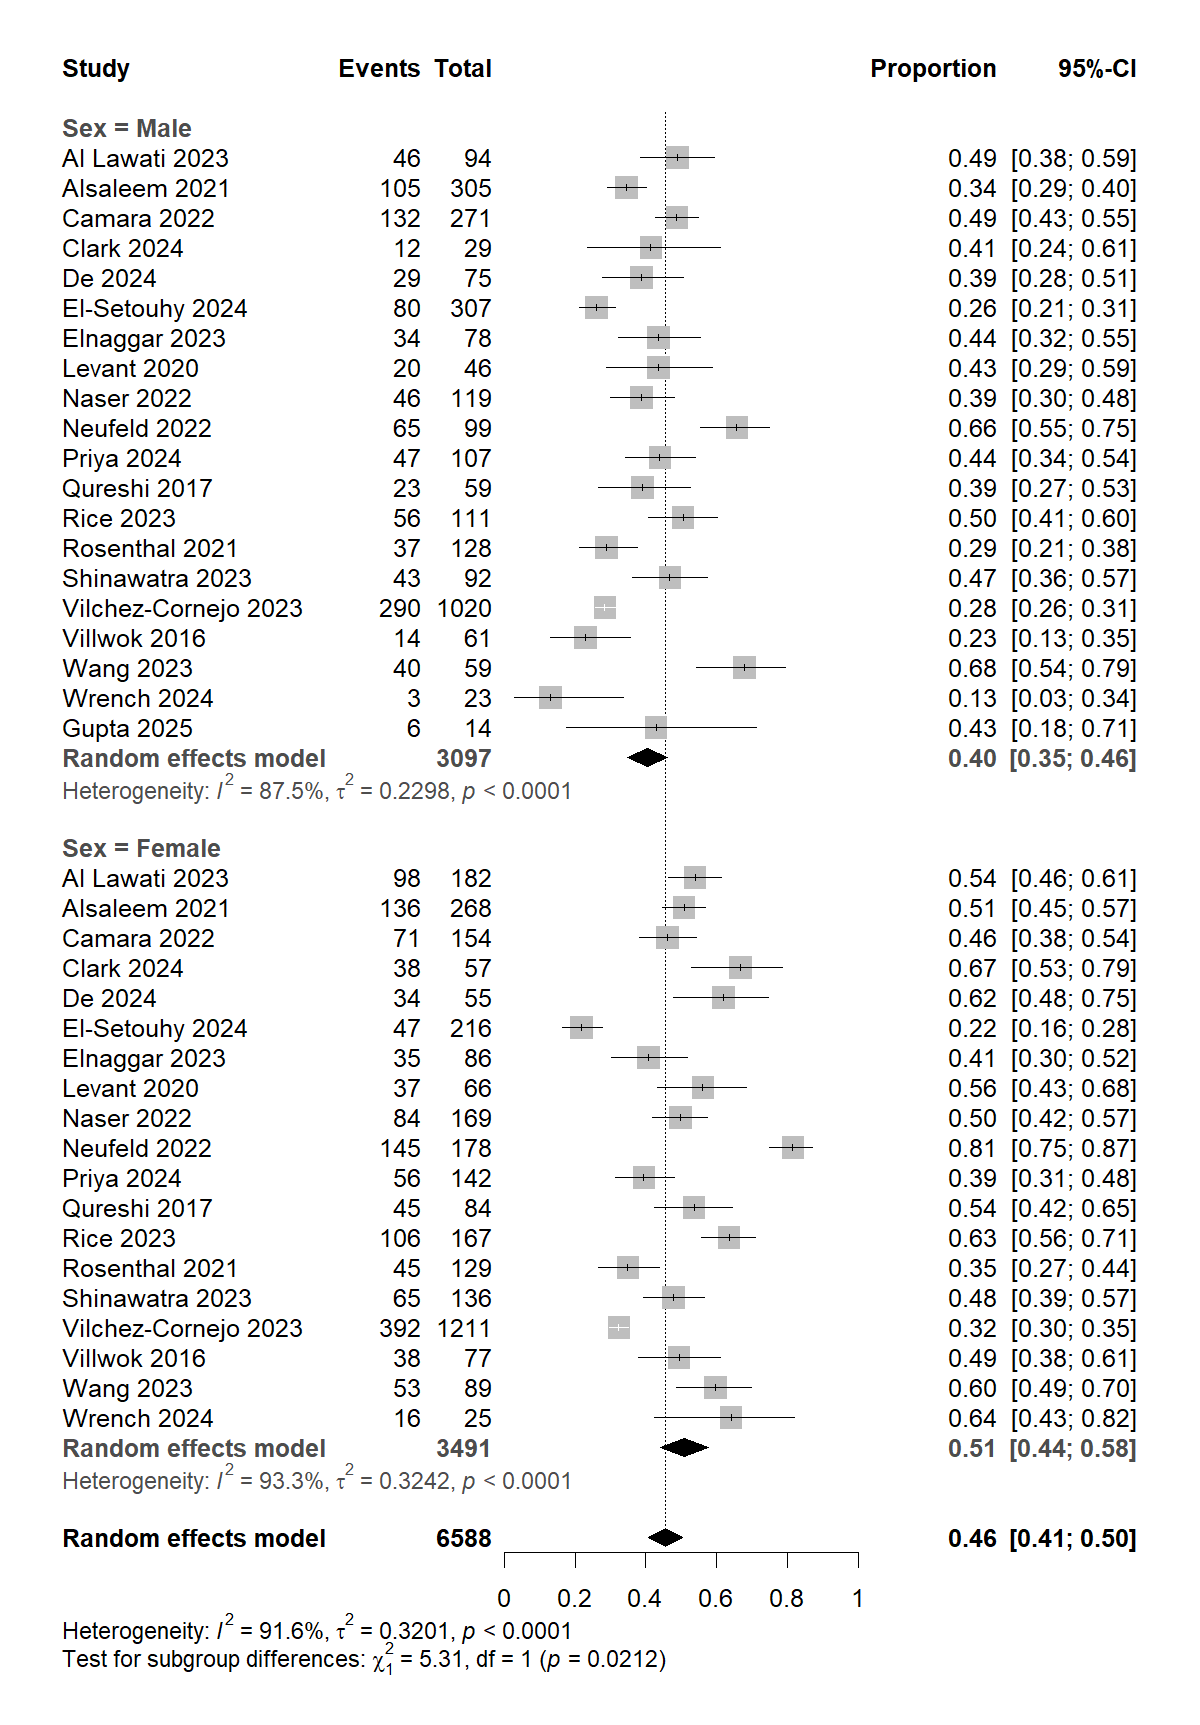


*Figure S2. Forest plot of the prevalence of Impostor phenomenon (IP) by sex using a random-effects model*

**
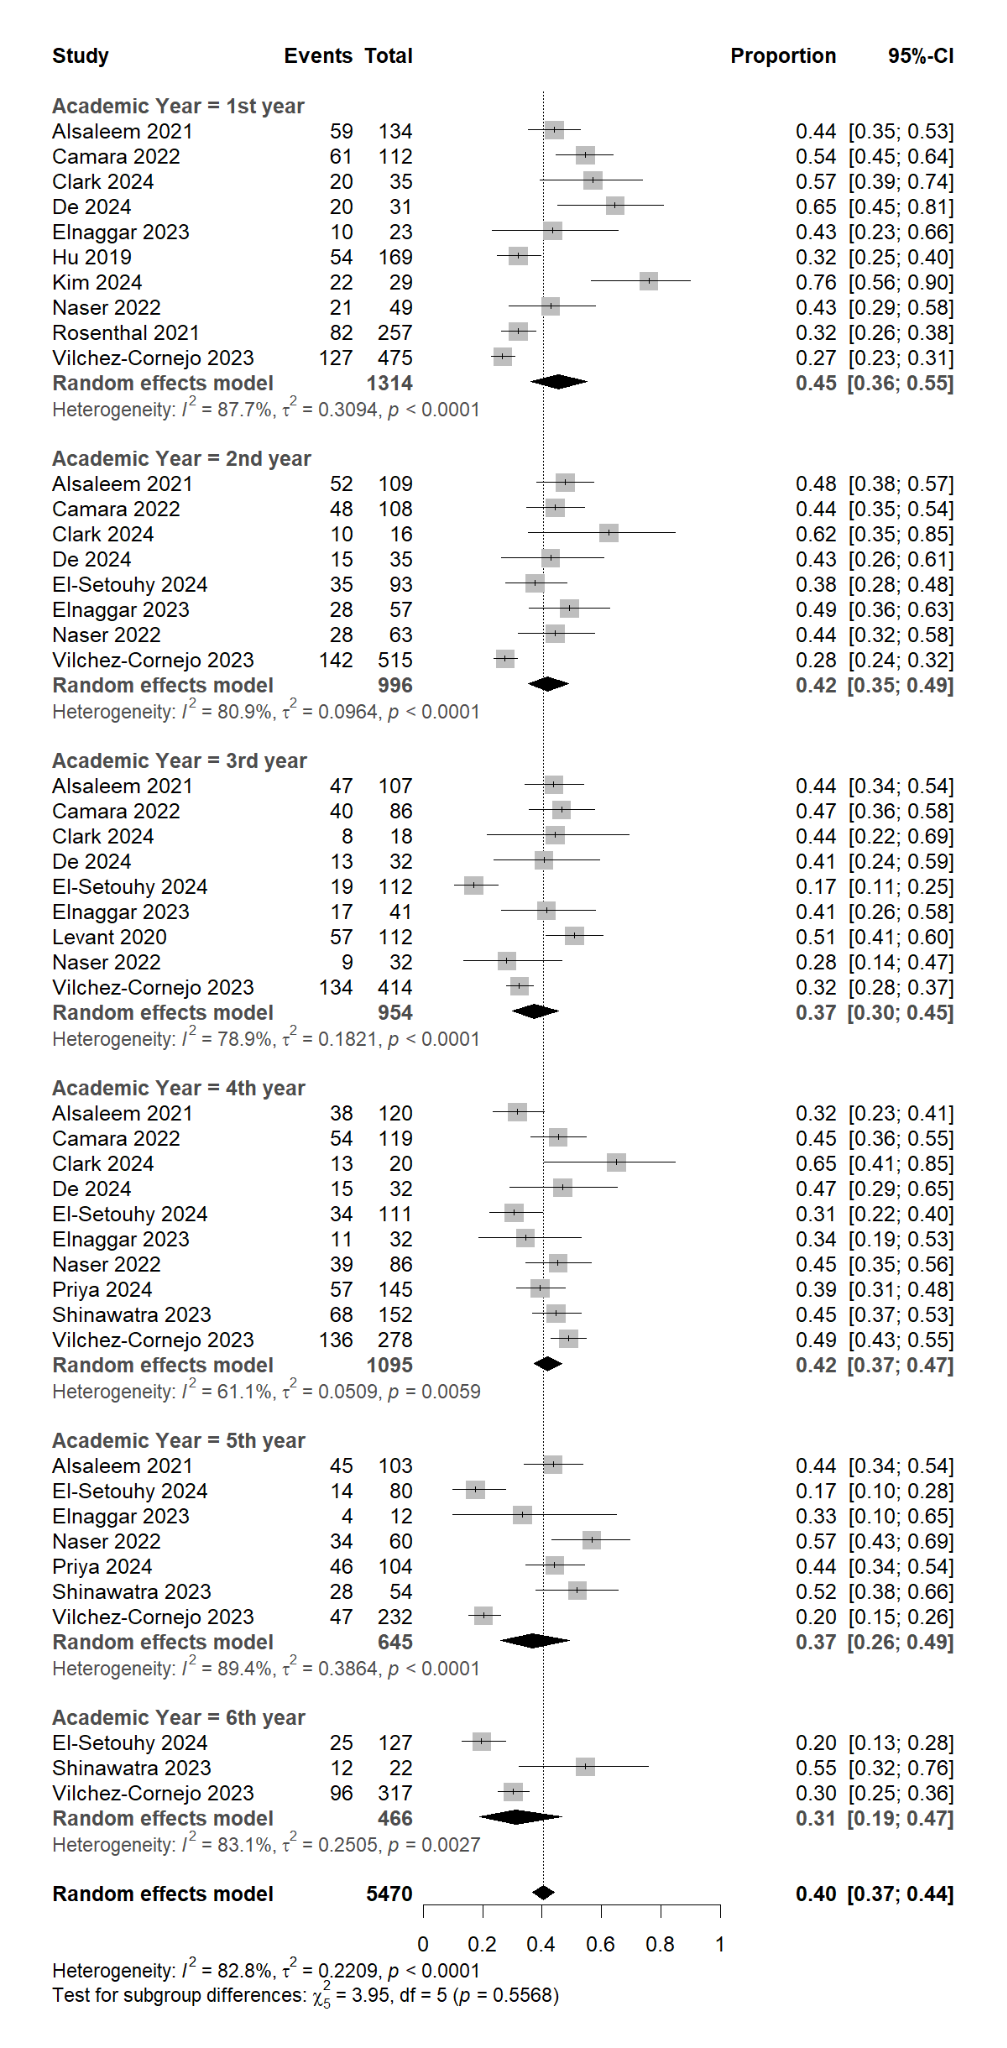
**

***Figure S3. Forest plot of the prevalence of Impostor phenomenon (IP) by academic year using a random-effects model***

**
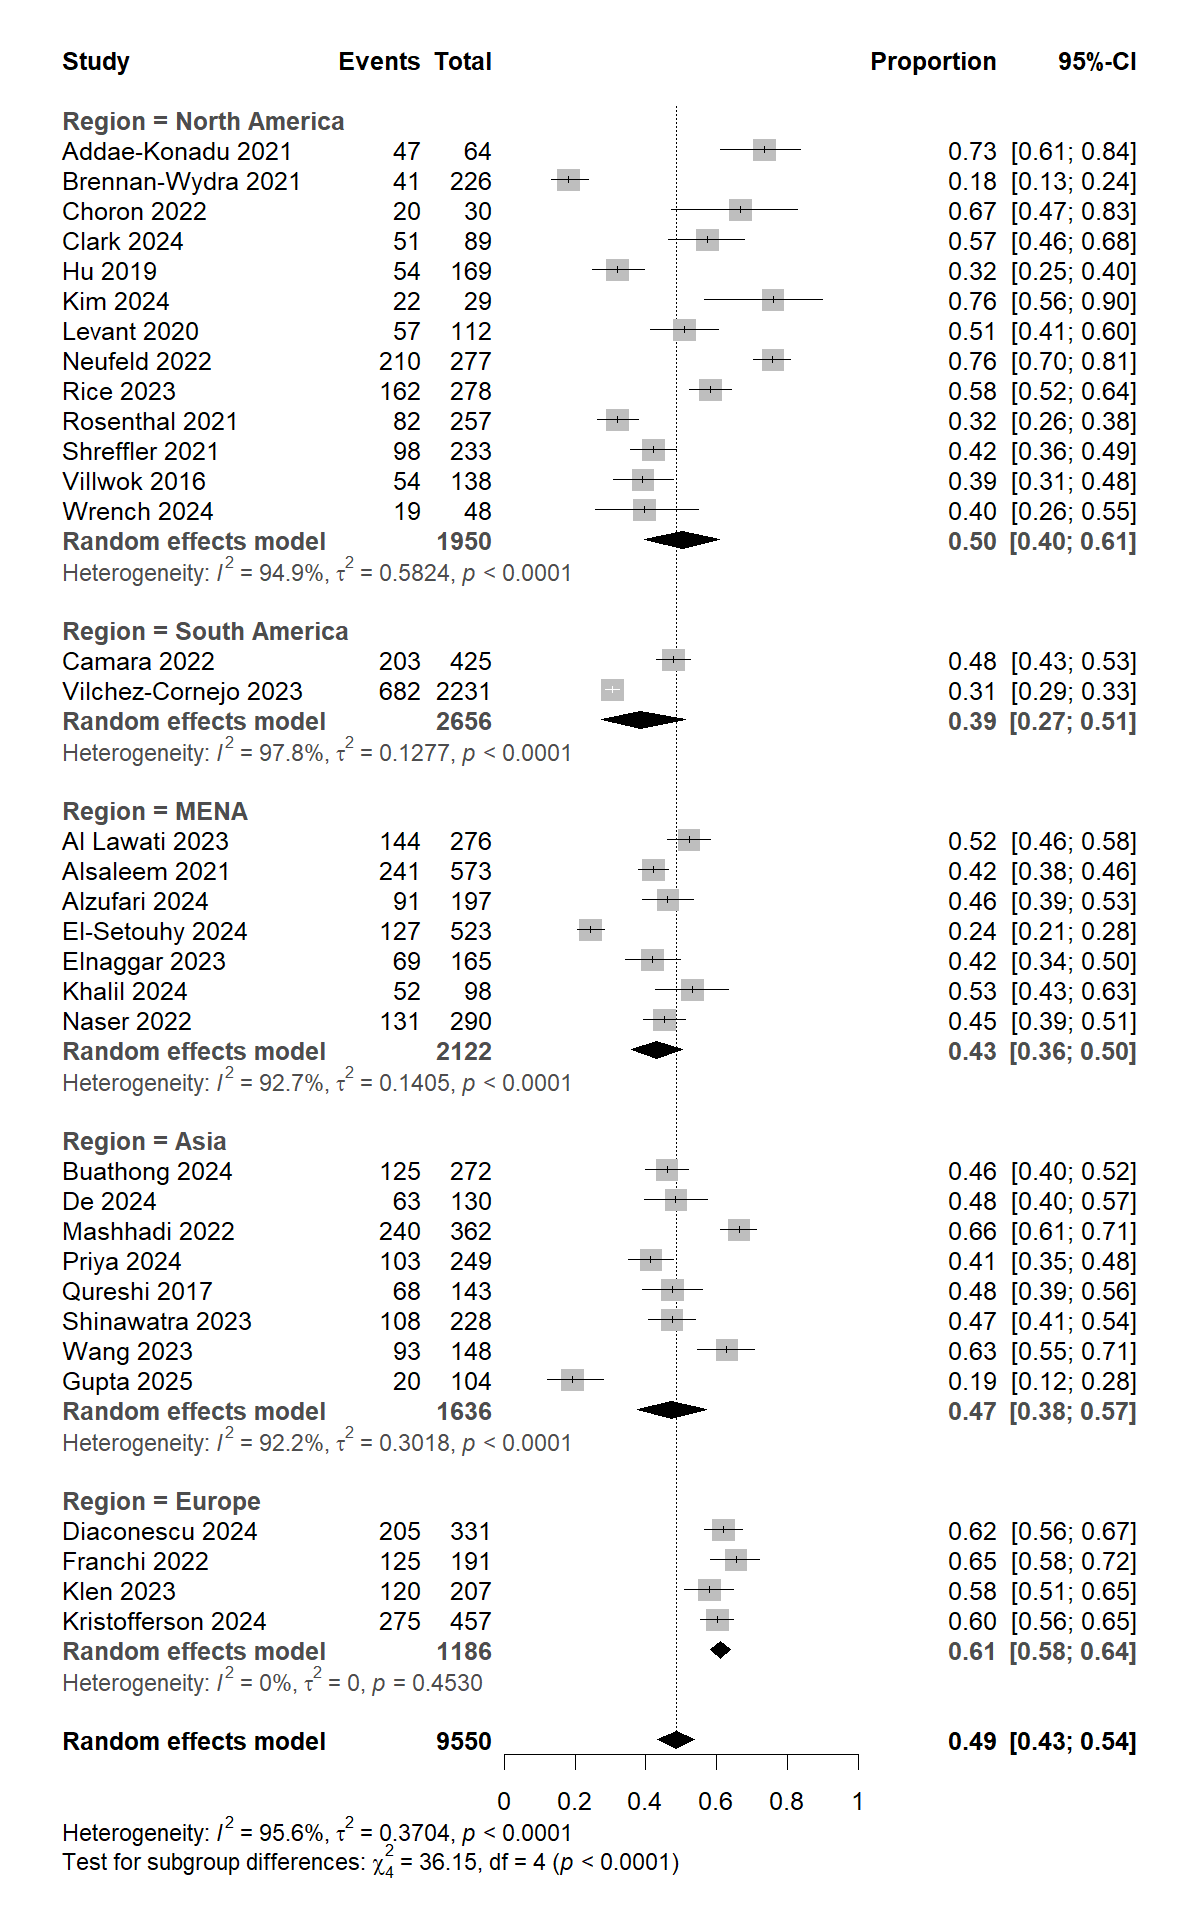
**

***Figure S4. Forest plot of the prevalence of Impostor phenomenon (IP) by region using a random-effects model***

**
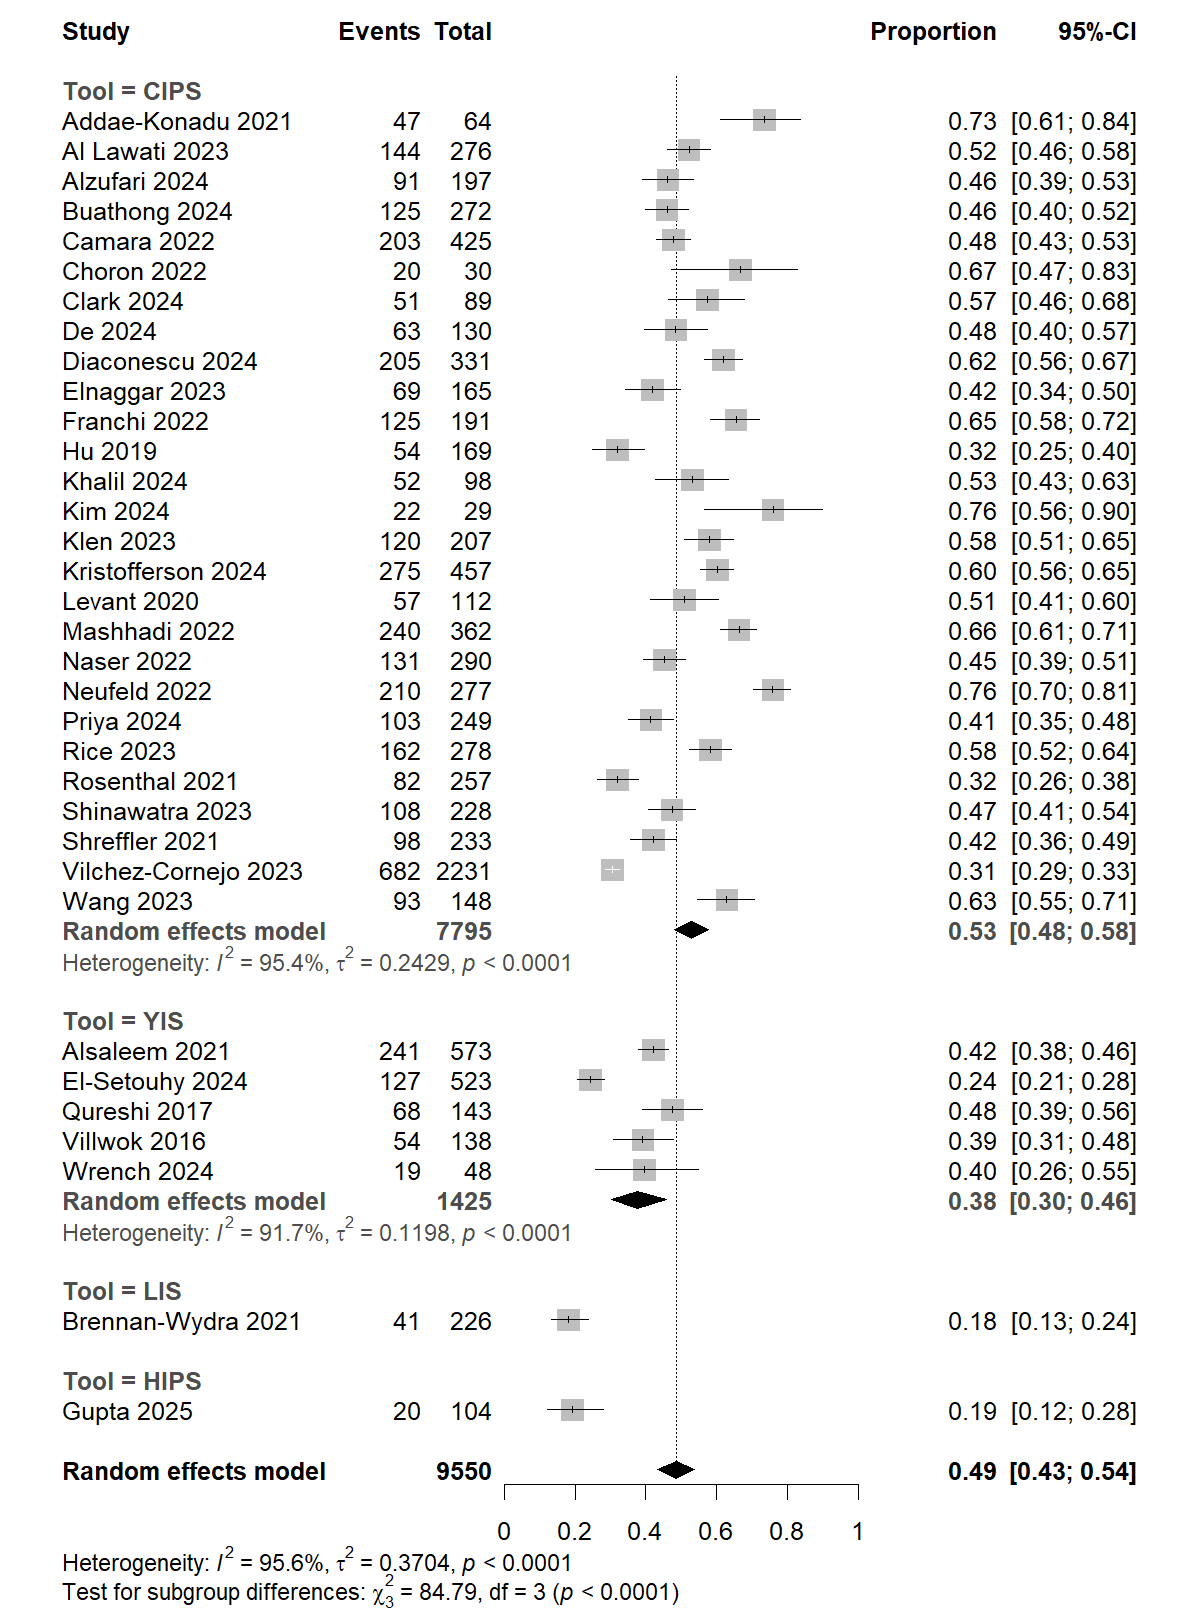
**

***Figure S5. Forest plot of the prevalence of Impostor phenomenon (IP) by tool using a random-effects model***

***
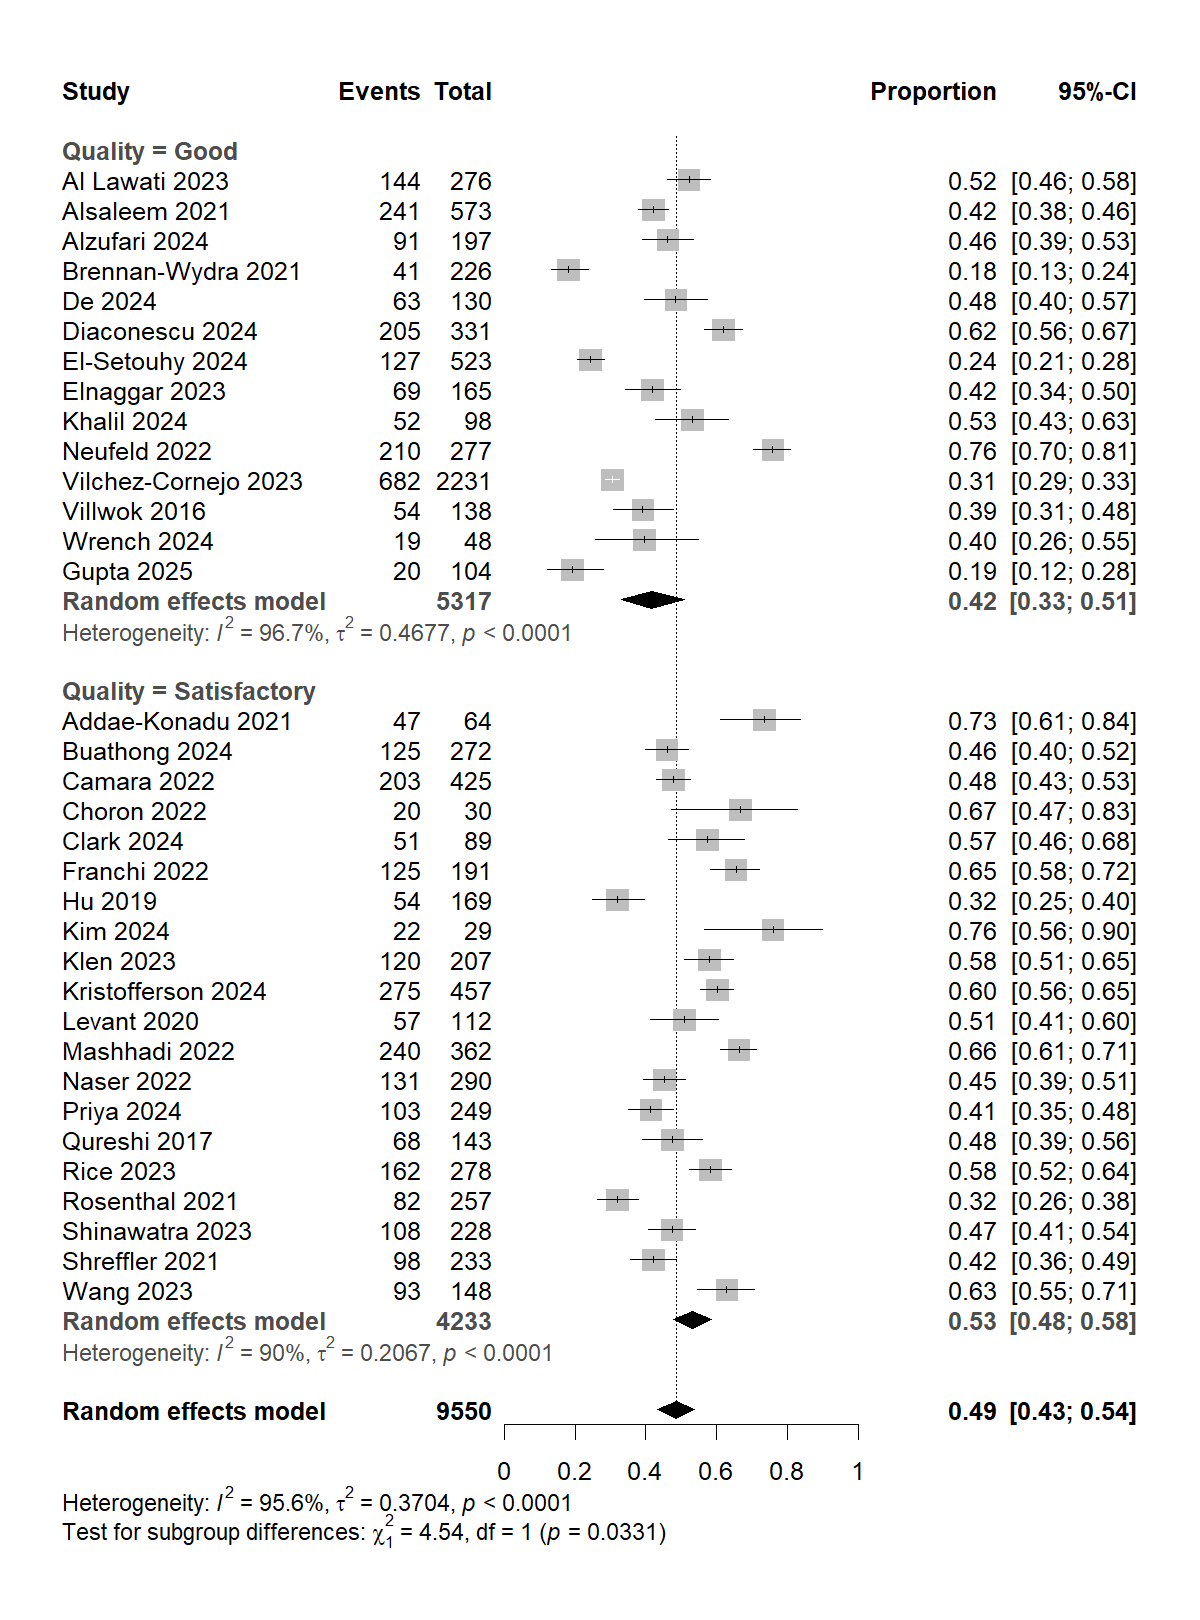
***

***Figure S6. Forest plot of the prevalence of Impostor phenomenon (IP) by quality using a random-effects model***

***
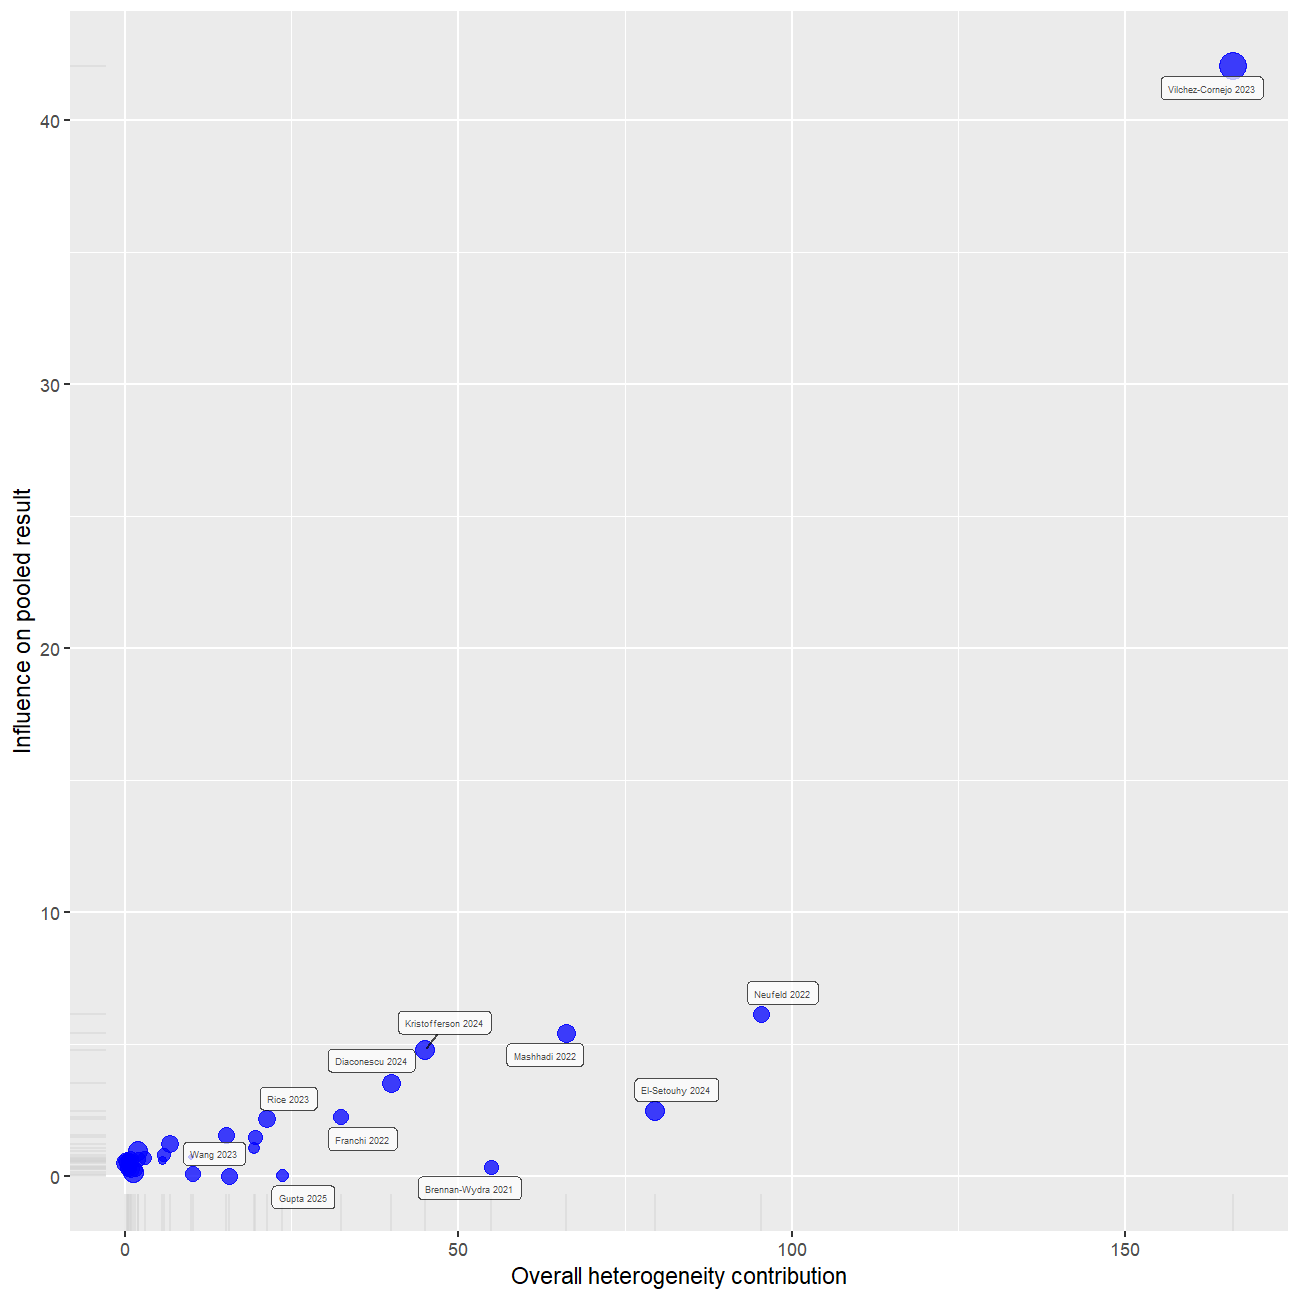
***

***Figure S7. Baujat plot identifying influential studies***

***
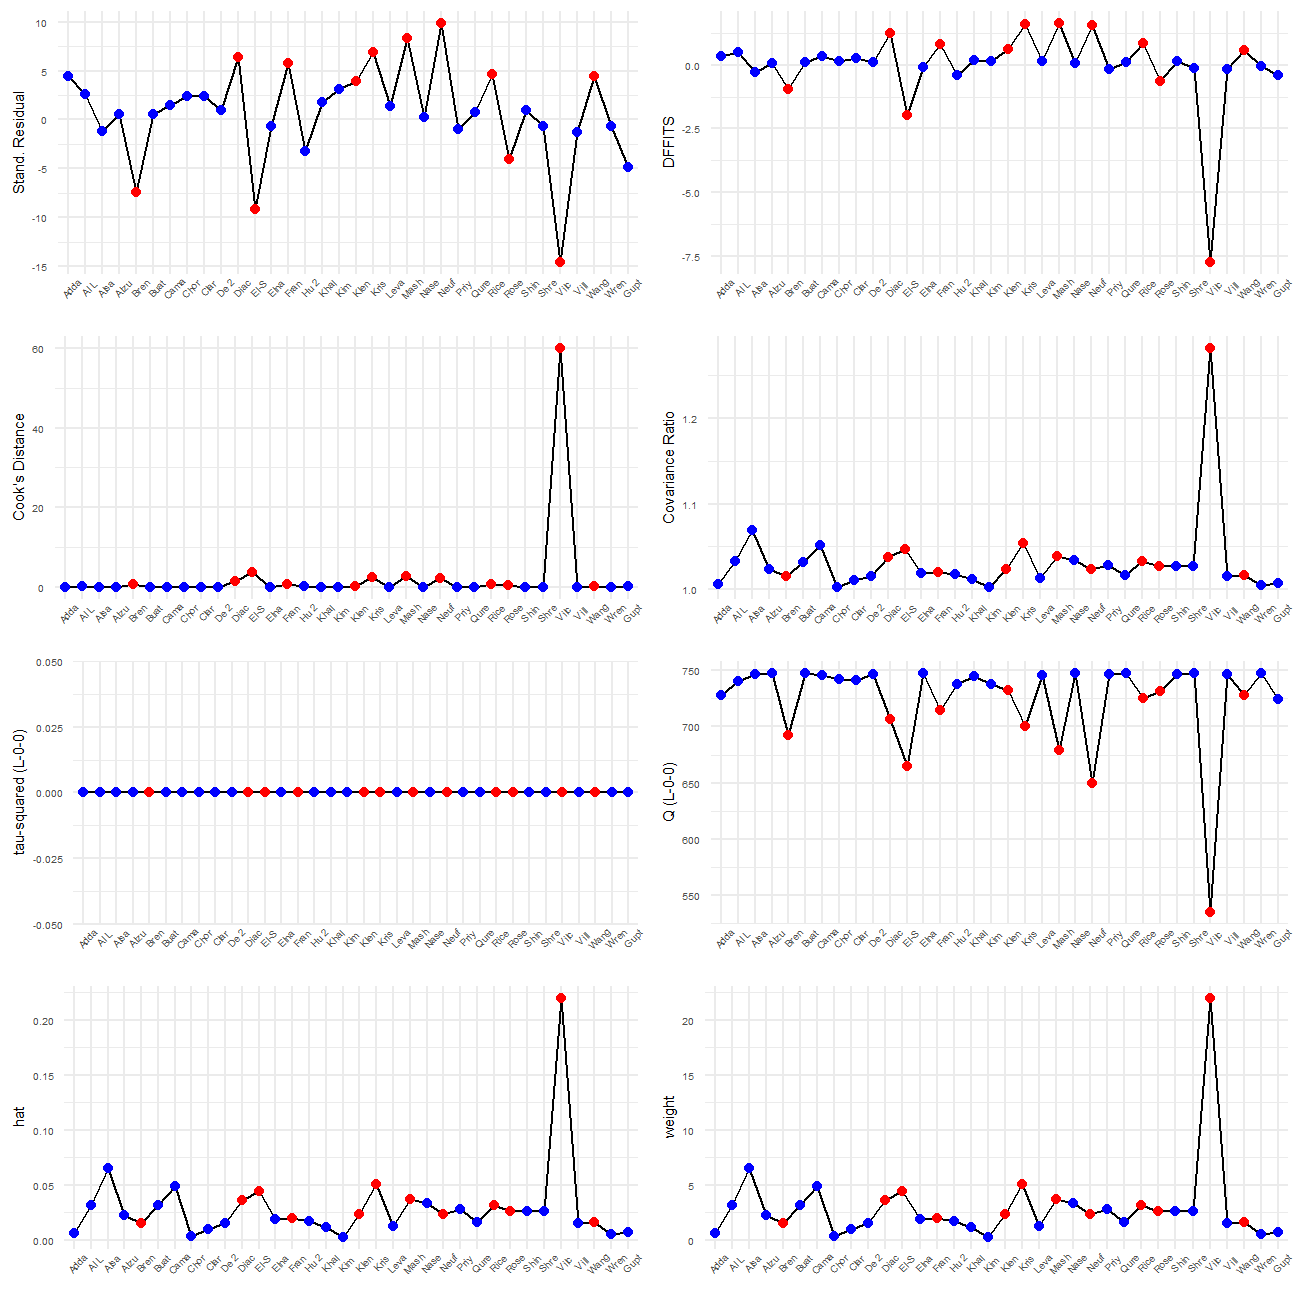
***

***Figure S8. Influence diagnostics plot***

***
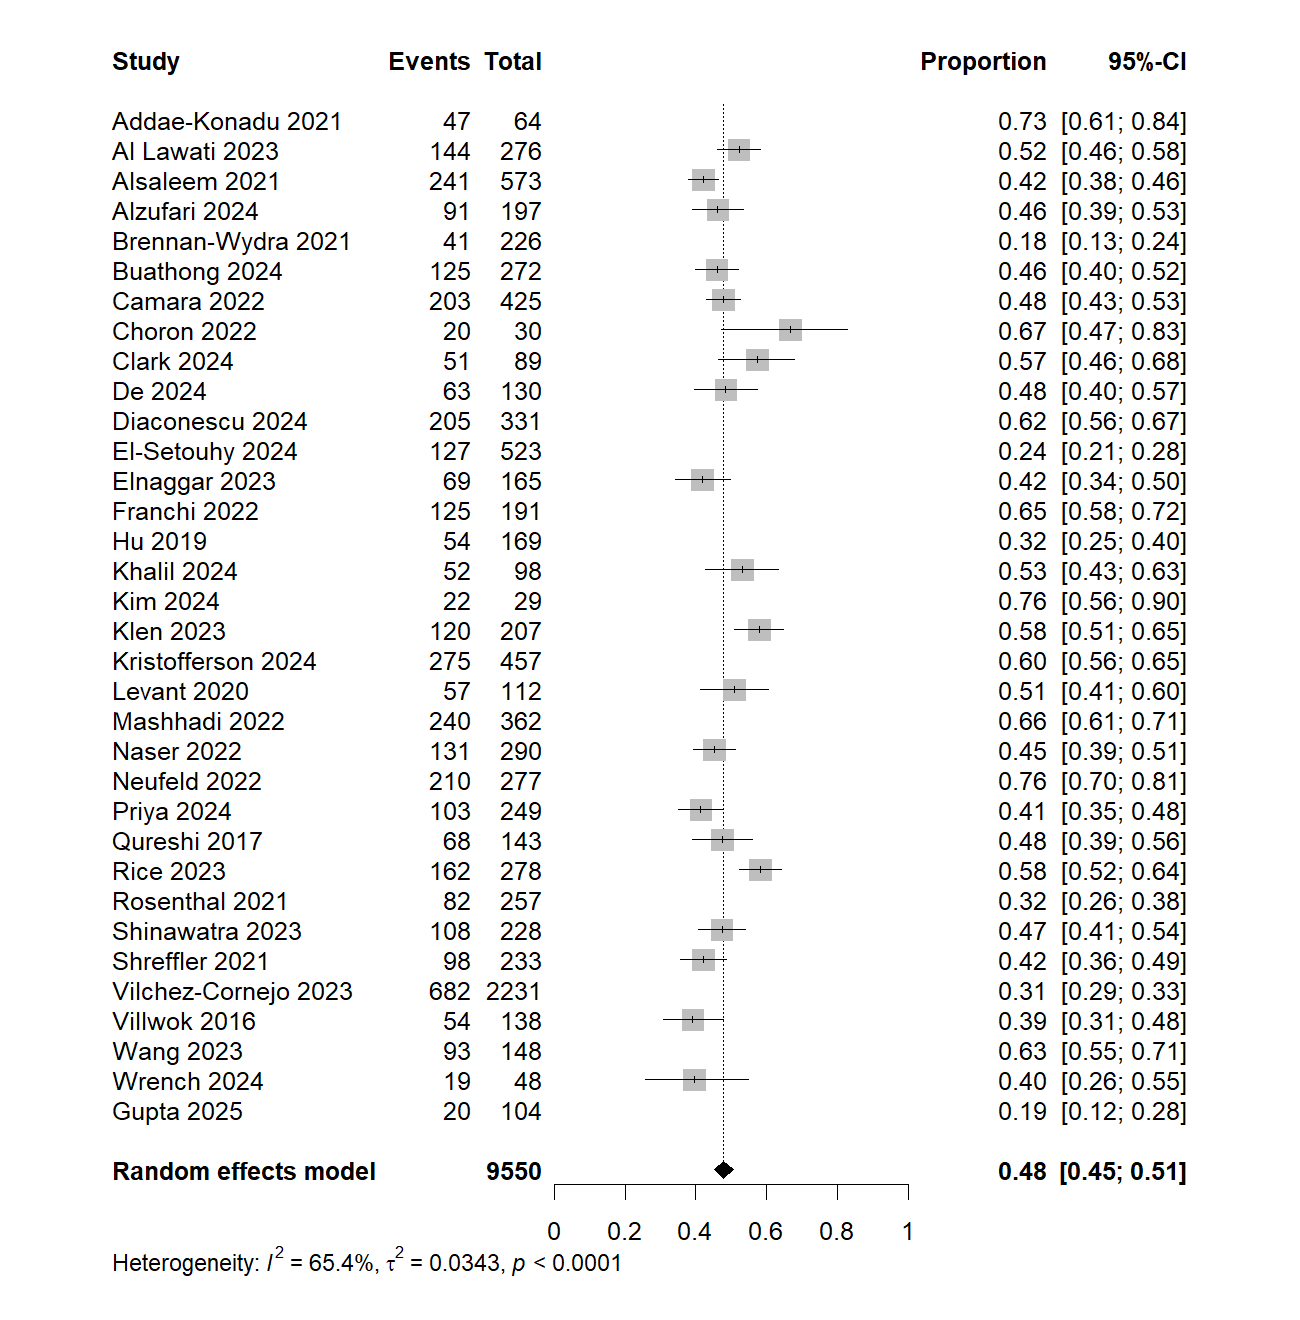
***

***Figure S9. Forest plot of the sensitivity analysis after removing outliers***

***
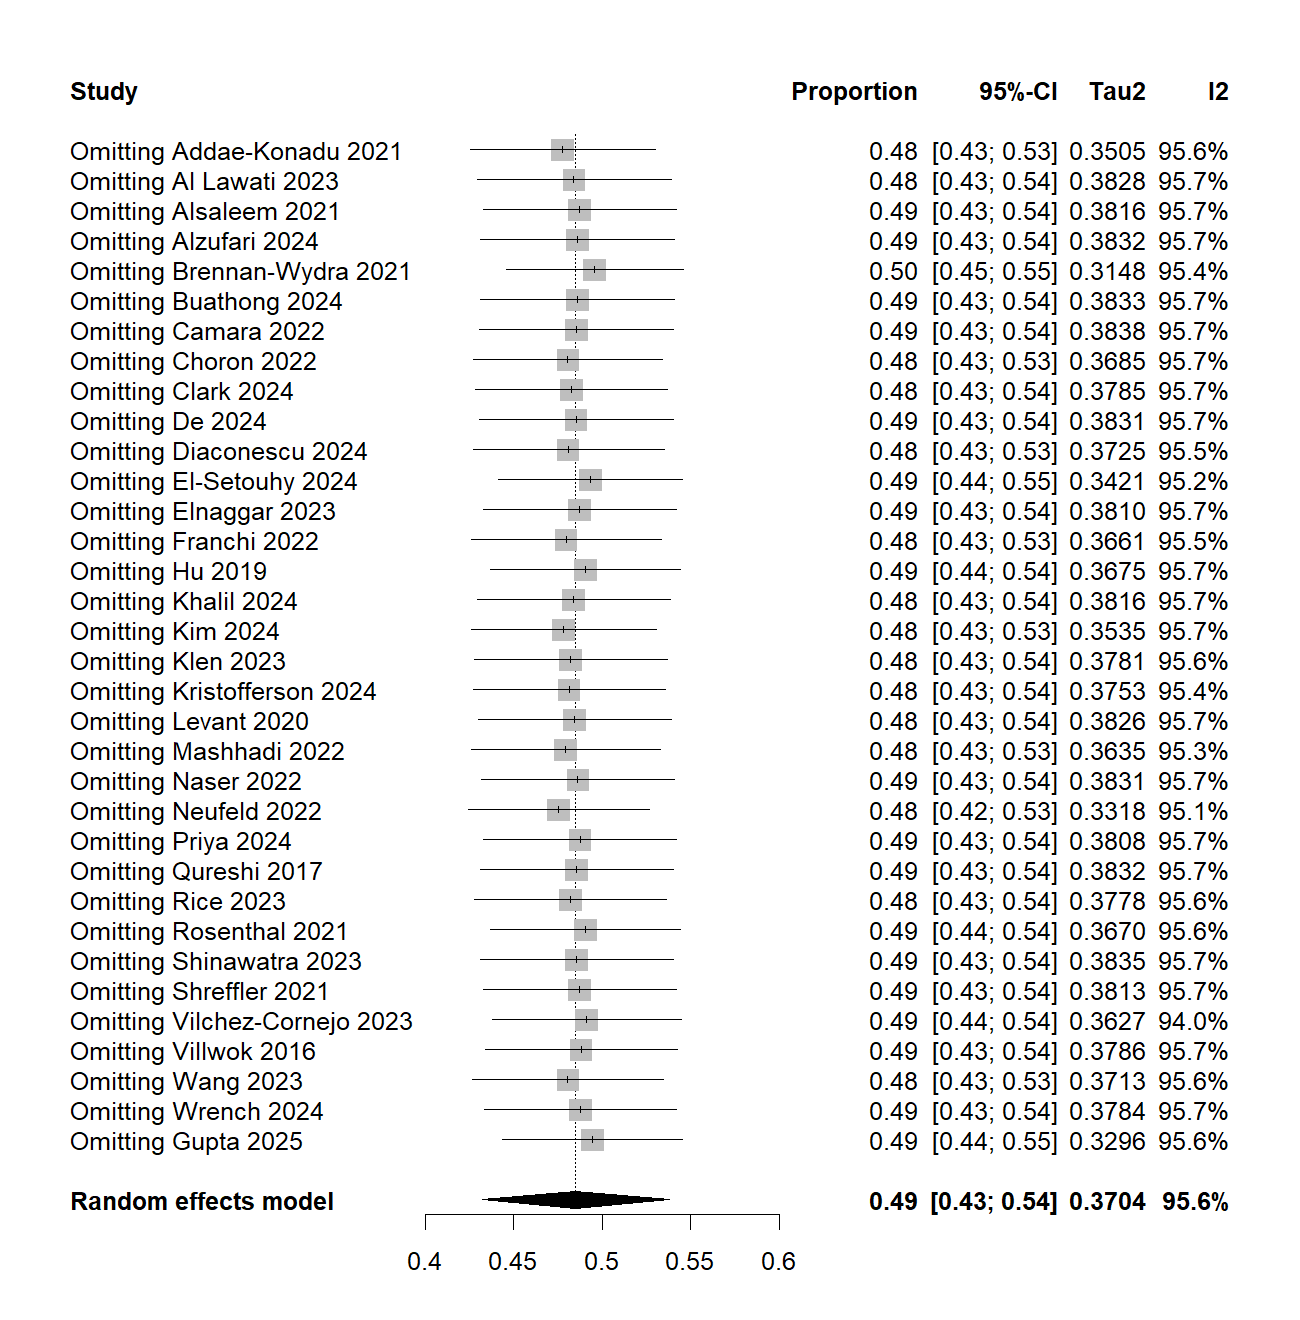
***

***Figure S10. Leave-one-out sensitivity analysis***
