# Supplementary material for: The Impostor Phenomenon Construct in Medical Education: A Meta-Analysis of its Prevalence and a Critical Appraisal of its Measurement
Source: Research Square preprint supplement (doi:10.21203/rs.3.rs-7650603/v1), 2025-10-21
Supplement: Supplementary file 2 [file b271991cbe66750aa6cdb195.docx]

**Table 1.** Summary of studies included in the systematic review and meta-analysis of imposter phenomenon among medical students

| **Study ID** | **Country** | **Study Design & Population** | **Medical students' characteristics** | **Tool** | **Quality score**1 | **Prevalence of IP, n (%)** | **Key findings** |
| --- | --- | --- | --- | --- | --- | --- | --- |
| **Addae-Konadu 2021** (Addae-Konadu et al., 2022) | USA | Cross-sectional – Medical students, residents, fellows, and attendings | 64 students, NR female, NR mean age | CIPS | 6 | 47 (73.4) | No significant difference in impostor phenomenon (IP) by gender, race, or region. Higher IP among those screening positive for anxiety. |
| **Al Lawati 2023** (Al Lawati et al., 2023) | Oman | Cross-sectional – Medical students | 276 students, 65.9% female, NR mean age | CIPS | 7 | 144 (52.2) | No significant difference in IP by gender. |
| **Alok 2024** (Alok et al., 2024) | India | Cross-sectional – Medical students | 377 students, NR female, NR mean age | CIPS | 4 | NA | IP positively correlated with stress, anxiety, and depression. |
| **Alsaleem 2021** (Alsaleem et al., 2021) | Saudi Arabia | Cross-sectional – Medical students | 573 students, 46.8% female, 21.27 years (mean age) | YIS | 7 | 241 (42.1) | Higher IP in females; no association with GPA, income, or family background. |
| **Alzufari 2024** (Alzufari et al., 2024) | UAE | Cross-sectional – Medical and dentistry students | 197 students, 59.6% female, NR mean age | CIPS | 8 | 91 (46.2) | IP correlated with advisor’s attitude and comparison with peers’ performance and grades. |
| **Brennan-Wydra 2021** (Brennan-Wydra et al., 2021) | USA | Cross-sectional – Medical students | 226 students, 53.1% female, NA mean age | LIS | 7 | 41 (18.1) | Higher IP in females; positively correlated with maladaptive perfectionism and suicidal ideation. |
| **Buathong 2024** (Buathong et al., 2023) | Thailand | Cross-sectional – Medical students | 272 students, 59.6% female, 21.55 ± 1.80 years | CIPS | 6 | 125 (46) | IP significantly associated with permissive parenting style, stressful life events, financial difficulties, and poor interpersonal relationships. Higher IP observed in individuals with anxiety, depression, low self-esteem, and those using emotive/palliative coping strategies. |
| **Camara 2022** (Camara et al., 2022) | Brazil | Cross-sectional – Medical students | 425 students, 36.2% female, 23.03 ± 5.0 years | CIPS | 5 | 203 (47.76) | No significant differences in IP by age, gender, semester, or religion. IP negatively correlated with resilience. |
| **Choron 2022** (Choron et al., 2023) | USA | Cohort – Medical students | 30 students, 0.3% female, 27 years | CIPS | 6 | 20 (66.67) | No significant difference in IP by race or breaks in training. IP positively correlated with longer periods working outside medicine. |
| **Clark 2024** (Clark et al., 2024) | USA | Cross-sectional – Medical students | 89 students, 64.0% female, NA mean age | CIPS | 4 | 51 (57.3) | Higher IP among females, fourth-year students, first-generation college students, and students from rural backgrounds. |
| **De 2024** (De et al., 2024) | India | Cross-sectional – Medical students | 130 students, 42.3% female, NA mean age | CIPS | 7 | 63 (48.5) | Higher IP in females. IP positively correlated with sleeping more than 56 hours per week, good academic performance, middle-class background, family psychiatric history, chronic medication use, and being in the second semester. |
| **Diaconescu 2024** (Diaconescu et al., 2024) | Romania | Cross-sectional – Medical students | 331 students, 69.2% female, 21.18 years | CIPS | 8 | 205 (61.93) | IP negatively associated with self-esteem. Marginally significant impact of IP on academic performance. |
| **El-Setouhy 2024** (El-Setouhy et al., 2024) | Saudi Arabia | Cross-sectional – Medical students | 523 students, 41.3% female, 22.1 ± 1.9 years | YIS | 7 | 127 (24.3) | IP positively correlated with being in the second academic year, the reason for choosing medicine, hours of sleep, and GPA. Negatively correlated with self-esteem. No association with gender, monthly family income, parental education level, or BMI. |
| **Elnaggar 2023** (Elnaggar et al., 2023) | Saudi Arabia | Cross-sectional – Medical students | 165 students, 52.1% female, NA mean age | CIPS | 6 | 70 (42.42) | No difference in IP by gender or academic phase. Positively correlated with a GPA <3. |
| **Franchi 2022** (Franchi & Russell-Sewell, 2023) | UK | Cross-sectional – Medical students | 191 students, 71.2% female, 21.10 ± 2.64 years | CIPS | 6 | 125(65.4) | Higher IP in females, with severity positively correlated with self-criticism, fear of failure, and perfectionism. |
| **Gupta 2025** (Gupta et al., 2025) | India | Cross-sectional – Medical students | 104 students, 51.9% female, NR mean age | HIPS, ≥ 42 | 20 (19.2) | Good | IP correlated positively with perceived stress scores, and negatively with coping ability. |
| **Henning 1998** (Henning et al., 1998) | USA | Cross-sectional – Medical, dental, nursing, and pharmacy students | 221 students, 53.0% female, 26.2 ± 5 years | CIPS | 6 | NA | Higher IP in females and early academic years. Lower distress in minority students, with no association to IP. |
| **Herța 2024** (Herța et al., 2024) | Romania | Cross-sectional – Medical students | 162 students, 59.0% female, NR mean age | CIPS | 3 | NA | Positive correlation of burnout and emotional exhaustion (a component of burnout) with overall impostor perception among international medical students. |
| **Holliday 2019** (Holliday et al., 2020) | USA | Cross-sectional – Medical and dental students | 343 students, NR female, 25 ± 3 years | CIPS | 5 | NA | Higher IP in females. No significant association between IP and being originally Hispanic or Latino. |
| **Houseknecht 2019** (Houseknecht et al., 2019) | USA | Longitudinal – Medical students | 110 students, NR female, NR mean age | CIPS | 7 | NA | From pre year 1 to post third-year clerkships, wellness and professional identity decreased, IP increased while calling did not change. |
| **Hu 2019** (Hu et al., 2019) | USA | Cross-sectional – Medical students | 169 students, 58.9% female, NR mean age | CIPS | 5 | 54 (31.9) | Positive correlation of high/intense IP with increased feelings of shame, embarrassment, and inadequacy. |
| **Khalil 2024** (Khalil AI, 2024) | Saudi Arabia | Cross-sectional – Medical and nursing students | 98 students, NR female, 21.4 ± 2.24 years | CIPS | 7 | 52 (53.1) | IP was negatively associated with resilience. |
| **Kim 2024** (Kim et al., 2024) | USA | Cross-sectional – Medical students | 29 students, 58.3% female, NR mean age | CIPS | 5 | 22 (75.9) | More frequent IP in females, students without prior military service, and those with three or more gap years. |
| **Klen 2023** (Kolenc Klen et al., 2025) | Slovenia | Cross-sectional – Medical students | 207 students, 64.3% female, 23.2 ± 2.6 years | CIPS | 6 | 120 (58) | Higher IP in females, with no significant associations with age, year of study, or prior clinical work experience. |
| **Kristofferson 2024** (Kristoffersson et al., 2024) | Sweden | Cross-sectional – Medical students | 457 students, 62.6% female, NR mean age | CIPS | 6 | 275 (60.2) | Higher IP and lower resilience scores in females; IP negatively associated with resilience. |
| **Levant 2020** (Levant et al., 2020) | USA | Cross-sectional – Medical students | 112 students, NR female, 25.8 ± 3 years | CIPS | 6 | NA | No association between responses to specific items and self-reported underrepresented minority status. |
| **Mashhadi 2022** (Mashhadi et al., 2022) | Pakistan | Cross-sectional – Medical and dental students | 362 students, NR female, NR mean age | CIPS | 5 | 240 (66.3) | IP significantly associated with gender, age, academic performance, and year of study. No significant associations with ethnicity, religion, hometown, college type, city, birth order, or total family income. |
| **Naser 2022** (Naser et al., 2022) | Bahrain | Cross-sectional – Medical students | 290 students, 58.3% female, NR mean age | CIPS | 5 | 131(45.2) | IP negatively associated with self-esteem, with small associations with marital status. No significant associations with gender, age, degree status, year of study, pre-clinical vs. clinical stage, domestic vs. international status, or geographical region. |
| **Neufeld 2022** (Neufeld et al., 2023) | Canada | Cross-sectional – Medical students | 277 students, 64.3% female, NR mean age | CIPS | 7 | 204 (73.3) | IP significantly associated with gender, impersonal general causality orientation, and controlled motivation for pursuing medical school. No association with ethnic minority status, autonomy, competence, relatedness satisfaction in the medical program, autonomy general causality orientation, or autonomous motivation. |
| **Ogunyemi 2022** (Ogunyemi et al., 2022) | USA | Pre-post – Medical students, resident physicians, administrators and directors | 18 students, 77.5% female, NR mean age | YIS | 7 | NA | Participants with impostor syndrome competence subtypes reported increased perceptions of IP as a source of stress, a barrier to reaching full potential, and a factor in negative relationships and teamwork. |
| **Priya 2024** (Priya et al., 2024) | India | Cross-sectional – Medical students | 249 students, 57.0% female, NR mean age | CIPS | 6 | 103 (41.36) | No association of IP with gender or self-esteem. |
| **Qureshi 2017** (Qureshi et al., 2017) | India | Cross-sectional – Medical students | 143 students, 58.7% female, 24.08 ± 1.05 years | YIS | 5 | 68 (47.5) | No association of IP with gender. |
| **Rice 2023** (Rice et al., 2023) | USA | Cross-sectional – Medical students | 278 students, 60.0% female, NA mean age | CIPS | 6 | 162 (58.3) | Higher IP in females and in students at Predominantly White Institutions (PWI) compared to those at Historically Black Colleges/Universities (HBCU). Higher IP in Underrepresented in Medicine (UiM) students at PWIs than UiM students at HBCUs, as well as in non-UiM students at PWIs compared to non-UiM students at HBCUs. No association of IP with UiM status. |
| **Rosenthal 2021** (Rosenthal et al., 2021) | USA | Longitudinal – Medical students | 257 students, 50.2% female, NA mean age | CIPS | 7 | 82(32) | Higher IP and greater neuroticism/anxiety in females. IP increased from matriculation to the end of the first year. Significant associations of IP with specific personality traits across genders. Positive correlation of IP with neuroticism/anxiety and loneliness. Negative correlation of IP with self-compassion, sociability, self-esteem, interpersonal relationships, and health status. |
| **Sawant 2023** (Sawant et al., 2023) | India | Cross-sectional – Medical students and interns | 371 students, NA female, NA mean age | CIPS | 5 | NA | IP associated with medical year. No association of gender with IP, extraversion, openness, or self-esteem. Negative correlations of IP with self-esteem, extraversion, agreeableness, and conscientiousness. Positive correlation of IP with neuroticism. No association of IP with openness. |
| **Shill-Russell 2022** (Shill-Russell et al., 2022) | USA | Cross-sectional – Medical students | 600 students, 50.2% female, NA mean age | YIS | 5 | NA | Higher IP in females. No association of IP with intercept, science GPA, MCAT score, or the interaction between science GPA and MCAT score. |
| **Shinawatra 2023** (Shinawatra et al., 2023) | Thailand | Cross-sectional – Medical students | 228 students, 59.6% female, NA mean age | CIPS | 6 | 108 (47.4) | No association of IP with gender, medical year, ward rotation, training location, GPA, or family background. Positive correlations of IP with anxiety, stress, and depression. |
| **Shreffler 2020** (Shreffler et al., 2021) | USA | Cross-sectional – Medical students | 233 students, 45.6% female, NA mean age | CIPS | 6 | 98(42.1) | No association of IP with medical year or USMLE scores. |
| **Sivananthajothy 2024** (Sivananthajothy et al., 2024) | Canada | Cross-sectional – Medical students | 480 students, 72.5% female, NR mean age | CIPS | 6 | NA | Positive correlation of IP with depression, burnout, and interactions with medical student peers, faculty/preceptor/staff representation, and sense of belonging. Negative correlations of IP with representation, peer and faculty interactions, and sense of belonging. Faculty/preceptor/staff representation negatively correlated with depression and burnout. Sense of belonging negatively correlated with depression and burnout. Depression and burnout negatively correlated with representation. |
| **Tran 2024** (Tran et al., 2022) | USA | Pre-post – Medical students | 113 students, NA female, NR mean age | CIPS | 5 | NA | After the module, more participants recognized the impact of IP on themselves and others and reported greater confidence in managing its effects. 94% of first-year participants agreed on the module’s importance in their medical education. |
| **Vilchez-Cornejo 2023** (Vilchez-Cornejo et al., 2021) | Peru | Cross-sectional – Medical students | 2231 students, 54.3% female, 21 years | CIPS | 6 | 682 (30.6) | IP negatively associated with self-esteem. Higher IP in females, fourth-year students, and those experiencing depression, anxiety, or stress. |
| **Villwok 2016** (Villwock et al., 2016) | USA | Cross-sectional – Medical students | 138 students, 56.2% female, NA mean age | YIS | 7 | 54 (39.1) | Higher IP in females. Negative correlation of IP with being Asian or white. Significant associations of IP with exhaustion, cynicism, emotional exhaustion, depersonalization, and being in the fourth year. |
| **Wang 2023** (Wang et al., 2024) | China | Cross-sectional – Medical students and residents | 148 students, 60.1% female, NA mean age | CIPS | 6 | 93 (62.8%) | No difference in IP between students and residents based on time allocated to research. No association of IP with gender, clinical work and learning hours, research hours, sleep hours, or time allocated to entertainment or self-care. Positive correlations of IP with enrollment in the eight-year program compared to the 4+4 program and feeling challenged by clinical learning. Associations of IP with anxiety, depression, insomnia, and burnout. |
| **Wrench 2024** (Wrench et al., 2024) | USA | Pre-post – Medical students | 48 students, 52.0% female, NA mean age | YIS | 7 | 19 (40) | Higher IP in females. Positive correlation of IP with being ≤24 years old. No association of IP with ethnicity or being 25–29 years old. |
| Abbreviations: IP – Impostor Phenomenon; CIPS – Clance Impostor Phenomenon Scale; HIPS – Harvey Impostor Phenomenon Scale; LIS – Leary Impostor Scale; YIS – Young Impostor Score; NR – Not Reported; NA – Not Available; GPA – Grade Point Average; USA – United States of America; UAE – United Arab Emirates; UK – United Kingdom. 1Quality scores were assessed using the Newcastle-Ottawa Scale (NOS) Adapted for Cross-sectional Studies. | | | | | | | |
